# Supplementary material
Source: PubMed Central journal article supplement (PMC2215327)
Supplement: NIHMS35170-supplement-01.pdf [file NIHMS35170-supplement-01.pdf]

## Supplemental Data

### A Coupled Chemical-Genetic and Bioinformatic

### Approach to Polo-like Kinase Pathway Exploration

Jennifer L. Snead, Matthew Sullivan, Drew M. Lowery, Michael S. Cohen, Chao Zhang, David H. Randle, Jack Taunton, Michael B. Yaffe, David O. Morgan, and Kevan M. Shokat

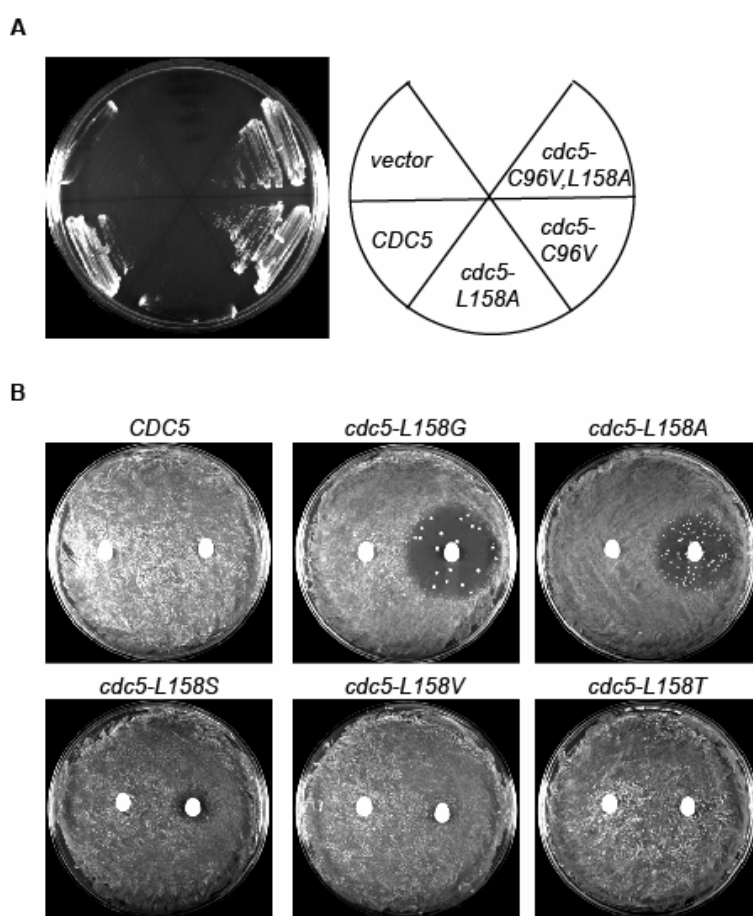

**Figure S1. Additional Analysis of Cdc5 Sequence Requirements for Inhibition by CMK**

(A) Cell viability of strains grown on 10  $\mu$ M CMK. Growth of strains requiring the indicated plasmid-borne *CDC5* alleles for survival, showing that both the space creating L158A mutation and a cysteine at position 96 are required in combination for inhibition by CMK.

(B) CMK inhibition of Cdc5 alleles. *cdc5-1 ts* strains bearing a plasmid expressing Cdc5 or the mutant indicated was plated and 10 nmol scaffold molecule (left) or CMK (right) applied to the filter disc. CMK dependent growth inhibition of only the *cdc5-L158G* and *cdc5-L158A* cells was apparent after 3 days at restrictive temperature (37 degrees).

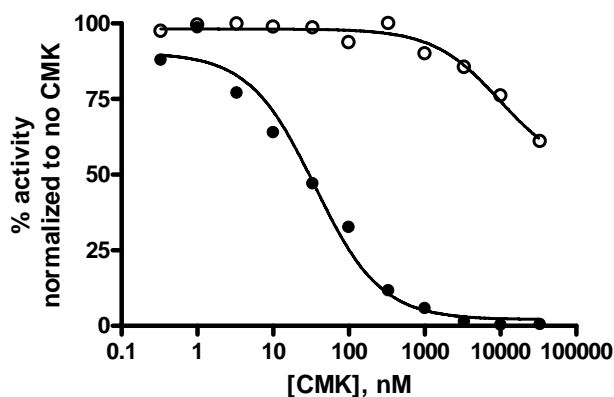

**Figure S2. IC<sub>50</sub> for CMK Inhibition of Cdc5(L158G)**

10 ng purified recombinant His6-Cdc5 (open circles) or His6-Cdc5(L158G) (closed circles) was pre-incubated at room temperature for 5 minutes with 10  $\mu$ g alpha-casein (dephosphorylated) in 25 mM HEPES, pH 8.0, 60 mM KCl, 15 mM MnCl<sub>2</sub>, and 100  $\mu$ g/ml BSA in the presence or absence of the indicated concentrations of CMK. After 5 minutes, [ $\gamma$ -<sup>32</sup>P] ATP (to 10  $\mu$ M, 100  $\mu$ Ci / ml) and DTT (to 1 mM) were added to begin the kinase reaction. After 30 minutes at room temperature, 10  $\mu$ l of each reaction solution was spotted on a nitrocellulose disk, washed 4 times (5 min each) in 1 M NaCl, 1% phosphoric acid, dried under a heat lamp for 15 min, and counted with a scintillation counter. Data was analyzed using GraphPad Prism software. The IC<sub>50</sub> for CMK inhibition of Cdc5(L158G) was determined by non-linear regression (R<sup>2</sup> = 0.98) to be 36 nM (95% confidence interval, 20 nM to 62 nM).
